# Supplementary material
Source: PubMed Central journal article supplement (PMC4568299)
Supplement: NIHMS62751-supplement-1.pdf [file NIHMS62751-supplement-1.pdf]

# Walker et al. APOBEC signatures and translocations in myeloma

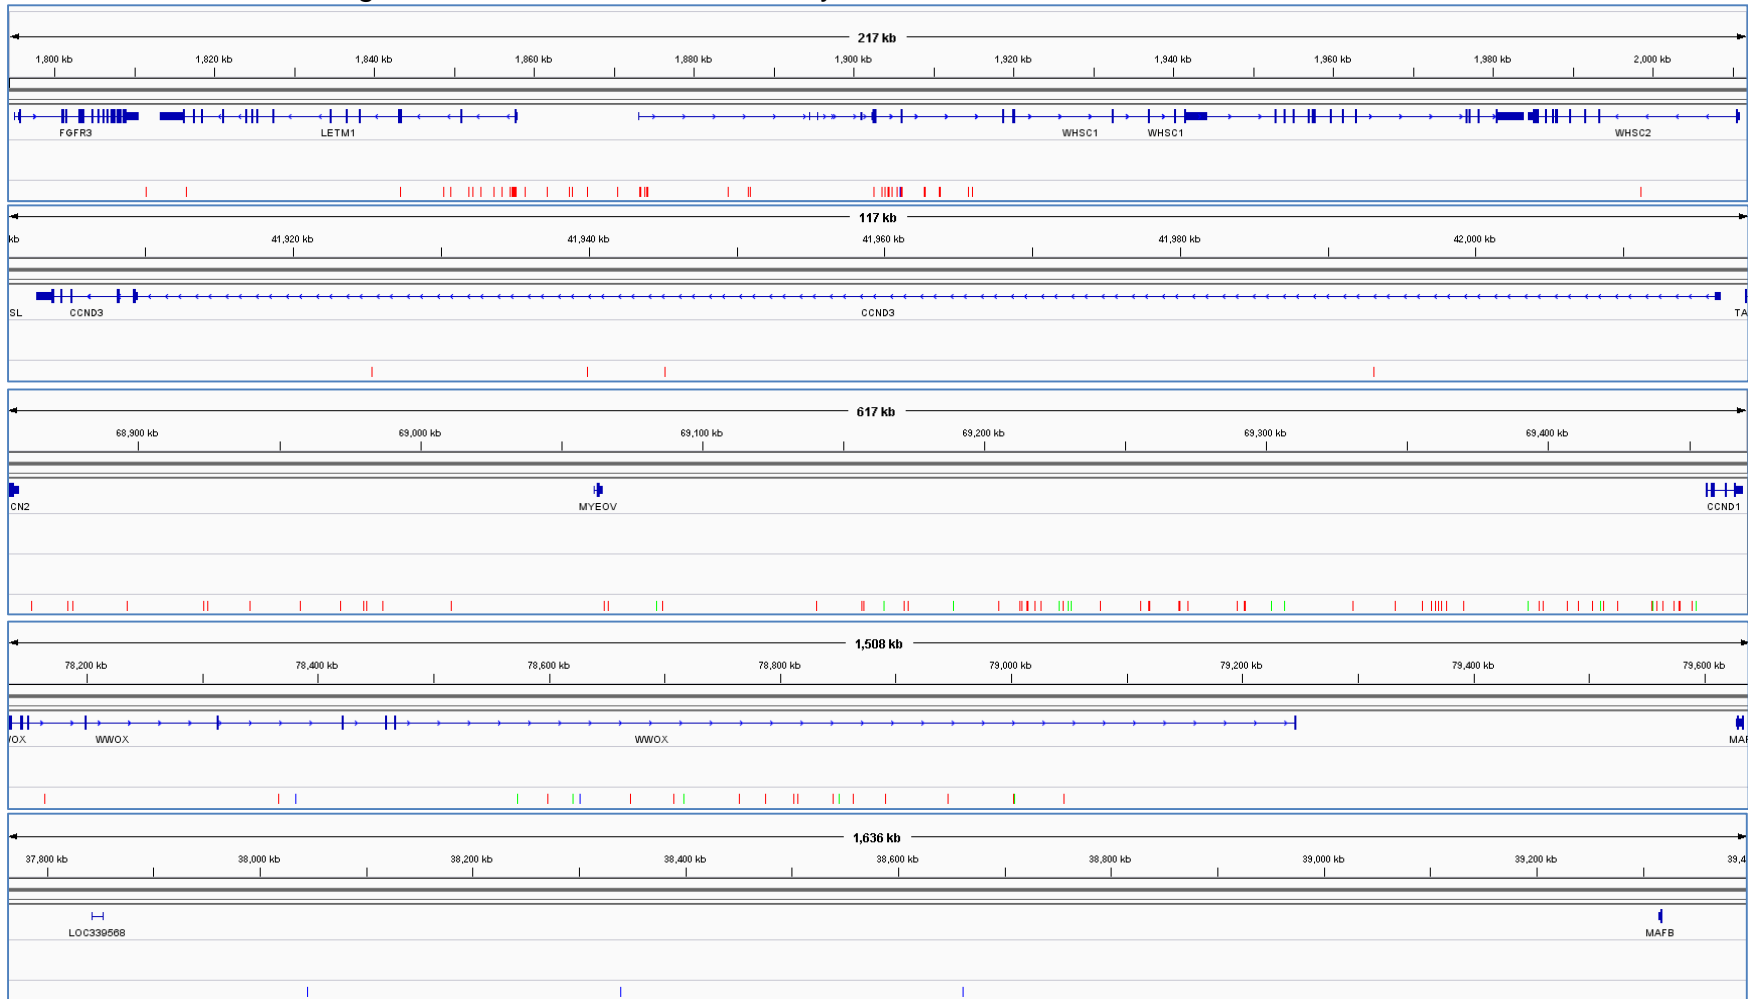

Supplementary Figure 1: Location of translocation breakpoints

A

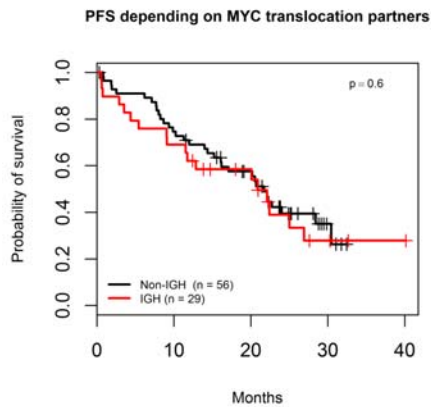

B

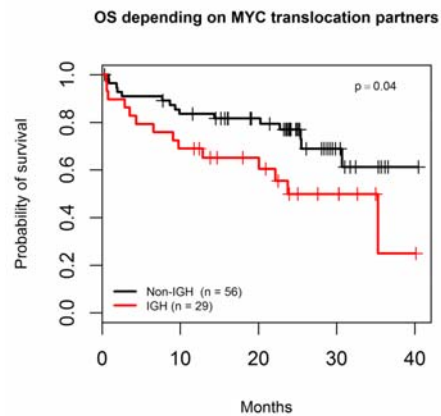

C

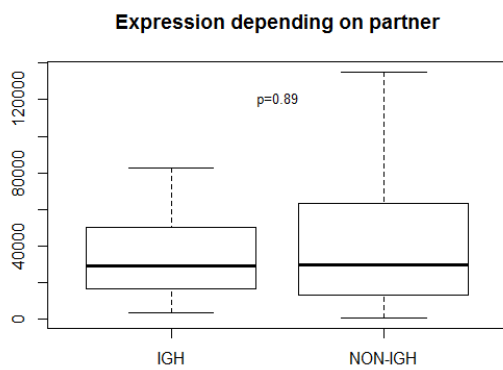

**Supplementary Figure 2.** *MYC* translocation partner and the effect on PFS (A), OS (B) and *MYC* expression (C). Box plots show minimum and maximum values in the whiskers and 25 and 75 percentiles in the box. The median value is shown by the bold line.

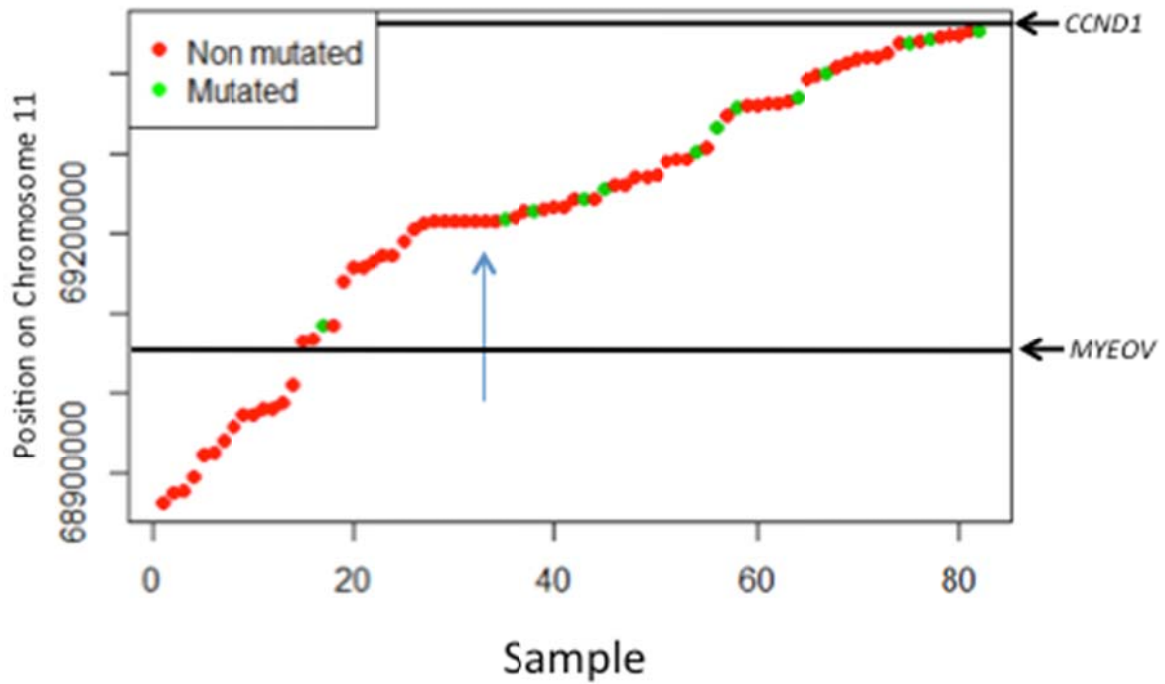

**Supplementary Figure 3:**  $t(11;14)$  breakpoints annotated according to *CCND1* mutation status indicates samples with a breakpoint closer to *CCND1* are more likely to have a mutated *CCND1* ( $p=0.03$ ).

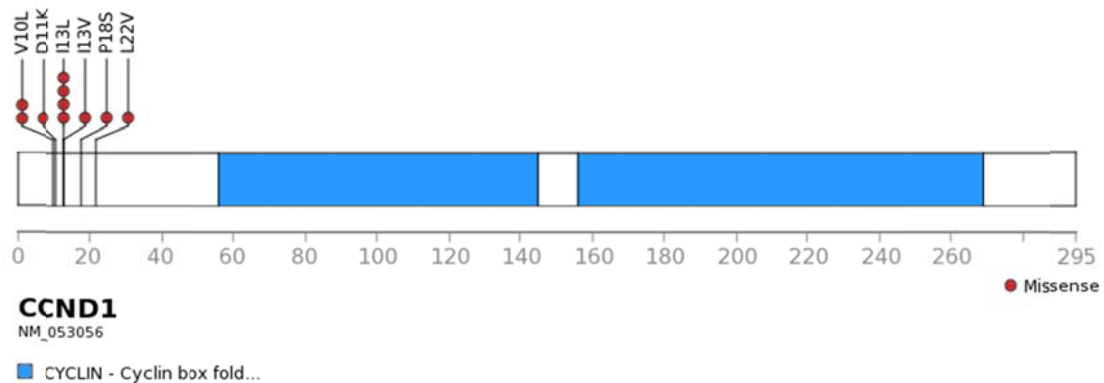

**Supplementary Figure 4:** CCND1 mutations in the Myeloma IX dataset.

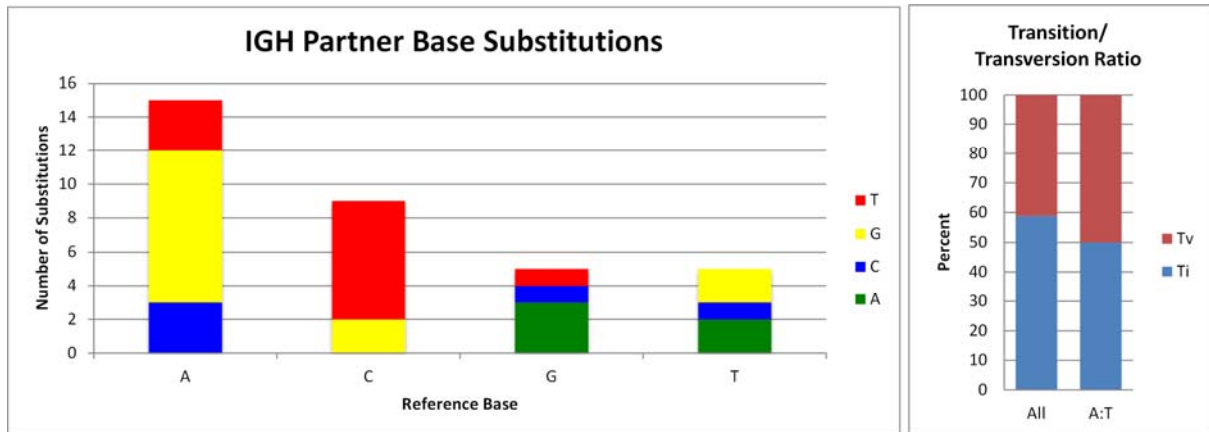

**Supplementary Figure 5.** The mutational pattern in translocation partner genes indicates that AID is responsible. AID is targeted to WRC motifs where the C is deaminated to U. This is repaired through replication, UNG or mismatch repair where error prone polymerases lead to transitions and transversions at surrounding A:T bases. This results in ~60% of mutations that arise through somatic hypermutation are in A:T bases and half of those are transversions. Here, we show the base changes in the IGH translocation partner oncogenes, where 58.8% of mutations are in A:T bases and exactly 50% of those are transversions.

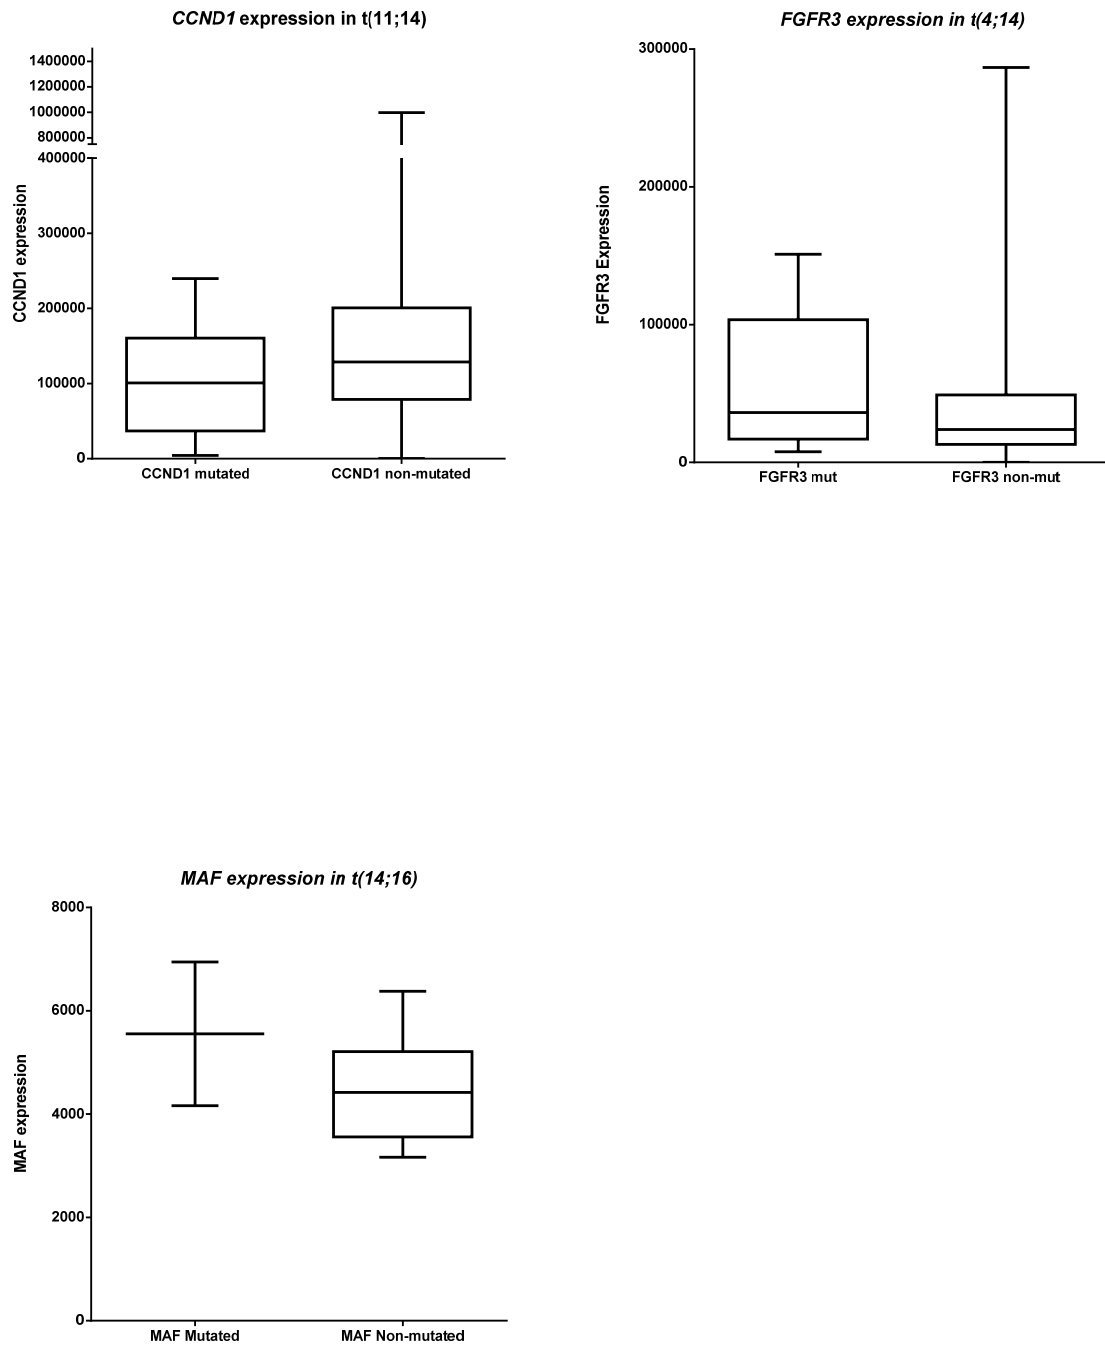

**Supplementary Figure 6** There is no significant expression difference between mutated and non-mutated translocation partner genes. Box plots show minimum and maximum values in the whiskers and 25 and 75 percentiles in the box. The median value is shown by the bold line.

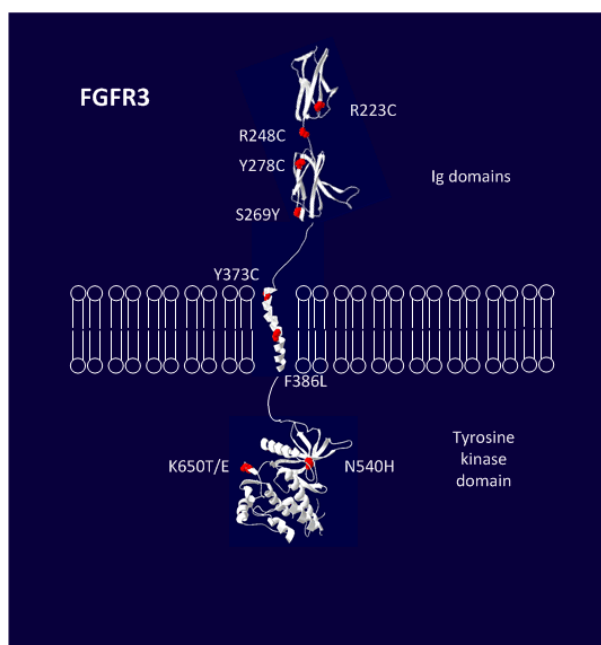

**Supplementary Figure 7:** *FGFR3* mutations activate the RAS pathway in myeloma cell lines. Crystal structure of *FGFR3* with mutations marked in red. The extracellular immunoglobulin (Ig) domains, transmembrane and tyrosine kinase domains were taken from protein databank IDs of 3GRW, 2LZL and 4K33, respectively.

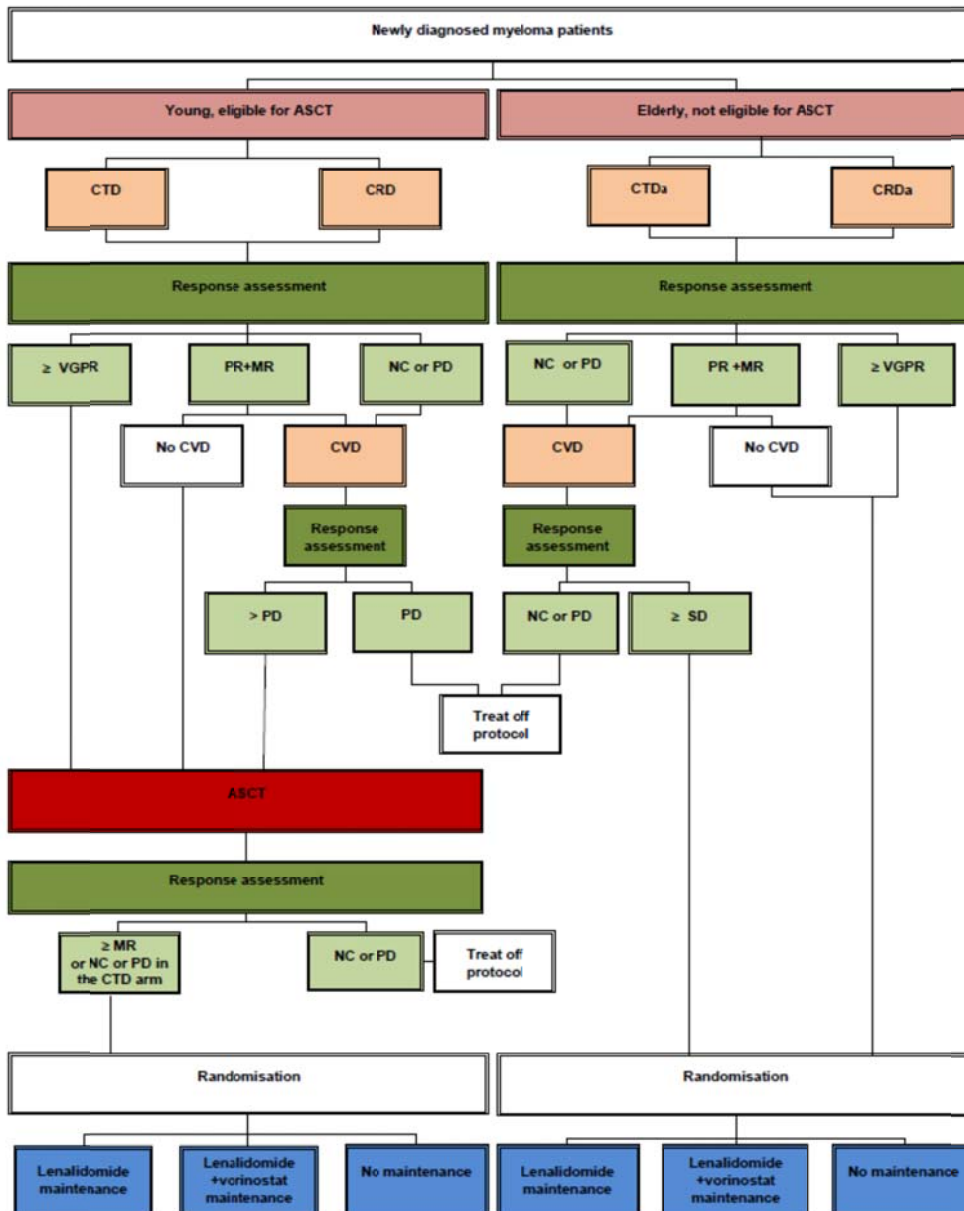

**Supplementary Figure 8.** Consort Diagram of the trial design for Myeloma XI.



**Supplementary Table 1:** Metrics for sequencing data.

| Feature        | Normal 463       | Tumour 463       | Combined 926     |
|----------------|------------------|------------------|------------------|
| Median depth   | 58.7 (19,179)    | 60.0x (28,198)   | 59.3x (19,198)   |
| 20x coverage % | 85.7 (46.8,97.0) | 86.4 (60.5,97.9) | 86.0 (46.8,97.9) |
| Duplication %  | 12.0 (0.1,83.6)  | 10.3 (0.1,76.6)  | 11.2 (0.1,83.6)  |

Power calculation: based on 463 patients and a mutation frequency of 1.5 mutations/Mb we calculate we have 99% power to detect mutations in 5% of patients and 69% power to detect mutations in 3% of patients (based on data from Lawrence et al. 2014 *Nature* **505**:7484).



**Supplementary Table 3:** Variants found in translocation partner oncogenes. SIFT predictions for translocation partner gene mutations. SIFT scores <0.05 are predicted as damaging (red), and those at 0.06 (orange) could also be considered damaging. Distances from the nearest AID WRC motif are shown from the consensus C base.

| Sample                 | Tx | Chr | Position | Ref      | Alt | Transcript change | Refseq ID    | Ti/TV | X_TO_Y_SIXTYPES | CONTEXT | Variant type | Exon | Gene  | Protein change | Variant classification | SIFT Score | WRC motif |
|------------------------|----|-----|----------|----------|-----|-------------------|--------------|-------|-----------------|---------|--------------|------|-------|----------------|------------------------|------------|-----------|
| 12-0440-B-BMA-R138-DNA | 4  | 4   | 1803398  | C        | T   | c.667C>T          | NM_000142    | Ti    | C>T/G>A         | CxG     | SNP          | 6    | FGFR3 | p.R223C        | Missense_Mutation      | 0          | -7        |
| 11-946-B-R138-DNA      | 4  | 4   | 1803564  | C        | T   | c.742C>T          | NM_000142    | Ti    | C>T/G>A         | GxG     | SNP          | 7    | FGFR3 | p.R248C        | Missense_Mutation      | 0          | 0         |
| 12-0459-B-BMA-R138-DNA | 4  | 4   | 1803564  | C        | T   | c.742C>T          | NM_000142    | Ti    | C>T/G>A         | GxG     | SNP          | 7    | FGFR3 | p.R248C        | Missense_Mutation      | 0          | 0         |
| 12-1646-B-BMA-R138-DNA | 4  | 4   | 1803564  | C        | T   | c.742C>T          | NM_000142    | Ti    | C>T/G>A         | GxG     | SNP          | 7    | FGFR3 | p.R248C        | Missense_Mutation      | 0          | 0         |
| 11-1186-B-BMA-R138-DNA | 4  | 4   | 1803627  | A        | C   | c.805A>C          | NM_000142    | Tv    | T>G/A>C         | CxG     | SNP          | 7    | FGFR3 | p.S269R        | Missense_Mutation      | 0          | -2        |
| 12-0156-B-BMA-R138-DNA | 4  | 4   | 1803655  | A        | G   | c.833A>G          | NM_000142    | Ti    | T>C/A>G         | TxC     | SNP          | 7    | FGFR3 | p.Y278C        | Missense_Mutation      | 0          | -1        |
| 12-1865-B-BMA-R138-DNA | 4  | 4   | 1806099  | A        | G   | c.1118A>G         | NM_000142    | Ti    | T>C/A>G         | TxT     | SNP          | 9    | FGFR3 | p.Y373C        | Missense_Mutation      | 0.01       | -3        |
| 11-715-B-R138-DNA      | 4  | 4   | 1806139  | C        | G   | c.1158C>G         | NM_000142    | Tv    | C>G/G>C         | TxA     | SNP          | 9    | FGFR3 | p.F386L        | Missense_Mutation      | 0.37       | +30       |
| 12-1700-B-BMA-R138-DNA | 4  | 4   | 1807369  | A        | C   | c.1618A>C         | NM_000142    | Tv    | T>G/A>C         | CxA     | SNP          | 12   | FGFR3 | p.N540H        | Missense_Mutation      | 0          | -2        |
| 12-1700-B-BMA-R138-DNA | 4  | 4   | 1807889  | A        | G   | c.1948A>G         | NM_000142    | Ti    | T>C/A>G         | GxA     | SNP          | 14   | FGFR3 | p.K650E        | Missense_Mutation      | 0          | +4        |
| 12-0197-B-BMA-R138-DNA | 4  | 4   | 1807890  | A        | C   | c.1949A>C         | NM_000142    | Tv    | T>G/A>C         | AxG     | SNP          | 14   | FGFR3 | p.K650T        | Missense_Mutation      | 0          | +5        |
| 11-1186-B-BMA-R138-DNA | 4  | 4   | 1808856  | T        | A   | c.2288T>A         | NM_000142    | Tv    | T>A/A>T         | CxG     | SNP          | 18   | FGFR3 | p.L763Q        | Missense_Mutation      | 0          | +8        |
| 11-1227-B-BMA-R138-DNA | 11 | 11  | 69456087 | A        | T   | c.6A>T            | NM_053056    | Tv    | T>A/A>T         | AxC     | SNP          | 1    | CCND1 | p.E2D          | Missense_Mutation      | 0.06       | -1        |
| 11-1152-B-BMA-R138-DNA | 11 | 11  | 69456116 | C        | T   | c.35C>T           | NM_053056    | Ti    | C>T/G>A         | AxC     | SNP          | 1    | CCND1 | p.T12I         | Missense_Mutation      | 0.39       | 0         |
| 10-183-B-R138-DNA      | 11 | 11  | 69456179 | A        | G   | c.98A>G           | NM_053056    | Ti    | T>C/A>G         | AxG     | SNP          | 1    | CCND1 | p.K33R         | Missense_Mutation      | 0.43       | +4        |
| 11-315-B-R138-DNA      | 11 | 11  | 69456200 | C        | T   | c.119C>T          | NM_053056    | Ti    | C>T/G>A         | CxC     | SNP          | 1    | CCND1 | p.P40L         | Missense_Mutation      | 0.05       | +5        |
| 11-1152-B-BMA-R138-DNA | 11 | 11  | 69456205 | G        | T   | c.124G>T          | NM_053056    | Tv    | C>A/G>T         | GxT     | SNP          | 1    | CCND1 | p.V42L         | Missense_Mutation      | 0.4        | -8        |
| 11-1227-B-BMA-R138-DNA | 11 | 11  | 69456211 | T        | A   | c.130T>A          | NM_053056    | Tv    | T>A/A>T         | CxA     | SNP          | 1    | CCND1 | p.Y44N         | Missense_Mutation      | 0          | -2        |
| 12-1525-B-BMA-R138-DNA | 11 | 11  | 69456211 | T        | G   | c.130T>G          | NM_053056    | Tv    | T>G/A>C         | CxA     | SNP          | 1    | CCND1 | p.Y44D         | Missense_Mutation      | 0          | -2        |
| 11-1152-B-BMA-R138-DNA | 11 | 11  | 69456215 | T        | G   | c.134T>G          | NM_053056    | Tv    | T>G/A>C         | TxC     | SNP          | 1    | CCND1 | p.F45C         | Missense_Mutation      | 0          | +2        |
| 11-017-B-R138-DNA      | 11 | 11  | 69456219 | A        | T   | c.138A>T          | NM_053056    | Tv    | T>A/A>T         | AxT     | SNP          | 1    | CCND1 | p.K46N         | Missense_Mutation      | 0.03       | +6        |
| 12-0994-B-BMA-R138-DNA | 11 | 11  | 69456219 | A        | T   | c.138A>T          | NM_053056    | Tv    | T>A/A>T         | AxT     | SNP          | 1    | CCND1 | p.K46N         | Missense_Mutation      | 0.03       | +6        |
| 10-365-B-R138-DNA      | 11 | 11  | 69456221 | G        | C   | c.140G>C          | NM_053056    | Tv    | C>G/G>C         | TxT     | SNP          | 1    | CCND1 | p.C47S         | Missense_Mutation      | 0.04       | -5        |
| 11-017-B-R138-DNA      | 11 | 11  | 69456223 | G        | A   | c.142G>A          | NM_053056    | Ti    | C>T/G>A         | TxT     | SNP          | 1    | CCND1 | p.V48M         | Missense_Mutation      | 0          | -3        |
| 10-365-B-R138-DNA      | 11 | 11  | 69456230 | A        | G   | c.149A>G          | NM_053056    | Ti    | T>C/A>G         | AxG     | SNP          | 1    | CCND1 | p.K50R         | Missense_Mutation      | 0.47       | +4        |
| 12-0484-B-BMA-R138-DNA | 11 | 11  | 69456230 | A        | G   | c.149A>G          | NM_053056    | Ti    | T>C/A>G         | AxG     | SNP          | 1    | CCND1 | p.K50R         | Missense_Mutation      | 0.47       | +4        |
| 12-1405-B-BMA-R138-DNA | 11 | 11  | 69456230 | A        | G   | c.149A>G          | NM_053056    | Ti    | T>C/A>G         | AxG     | SNP          | 1    | CCND1 | p.K50R         | Missense_Mutation      | 0.47       | +4        |
| 12-1405-B-BMA-R138-DNA | 11 | 11  | 69456256 | A        | G   | c.175A>G          | NM_053056    | Ti    | T>C/A>G         | GxT     | SNP          | 1    | CCND1 | p.I59V         | Missense_Mutation      | 0.15       | -2        |
| 11-062-B-R138-DNA      | 16 | 16  | 79632874 | C        | G   | c.926G>C          | NM_001031804 | Tv    | C>G/G>C         | CxT     | SNP          | 1    | MAF   | p.R309T        | Missense_Mutation      | 0.02       | +4        |
| 12-0349-B-BMA-R138-DNA | 16 | 16  | 79632931 | T        | C   | c.869A>G          | NM_001031804 | Ti    | T>C/A>G         | CxT     | SNP          | 1    | MAF   | p.K290R        | Missense_Mutation      | 0.02       | +1        |
| 11-1144-B-R138-DNA     | 16 | 16  | 79632965 | G        | A   | c.835C>T          | NM_001031804 | Ti    | C>T/G>A         | CxC     | SNP          | 1    | MAF   | p.R279C        | Missense_Mutation      | 0          | -4        |
| 11-918-B-R138-DNA      | 16 | 16  | 79632973 | C        | T   | c.827G>A          | NM_001031804 | Ti    | C>T/G>A         | CxG     | SNP          | 1    | MAF   | p.R276Q        | Missense_Mutation      | 0.06       | +1        |
| 11-1144-B-R138-DNA     | 16 | 16  | 79632974 | G        | A   | c.826C>T          | NM_001031804 | Ti    | C>T/G>A         | CxG     | SNP          | 1    | MAF   | p.R276W        | Missense_Mutation      | 0          | -7        |
| 11-099-B-R138-DNA      | 20 | 20  | 39316611 | A        | G   | c.880T>C          | NM_005461    | Ti    | T>C/A>G         | TxG     | SNP          | 1    | MAFB  | p.Y294H        | Missense_Mutation      | 0.03       | -6        |
| 10-141-B-R138-DNA      | -  | 4   | 1957576  | GGTGTGAG | G   | c.2675_splic      | NM_001042424 | -     | -               | -       | DEL          | 14   | WHSC1 | p.R892_s       | Splice_Site            | 0          | +2        |
| 10-141-B-R138-DNA      | -  | 4   | 1932437  | A        | C   | c.1495A>C         | NM_001042424 | Tv    | T>G/A>C         | GxG     | SNP          | 6    | WHSC1 | p.R499R        | Silent                 | 1          | +3        |
| 10-141-B-R138-DNA      | -  | 4   | 1952861  | A        | G   | c.1944A>G         | NM_001042424 | Ti    | T>C/A>G         | AxA     | SNP          | 10   | WHSC1 | p.Q648Q        | Silent                 | 1          | -2        |
| 10-141-B-R138-DNA      | -  | 4   | 1978255  | G        | A   | c.3675G>A         | NM_001042424 | Ti    | C>T/G>A         | CxA     | SNP          | 21   | WHSC1 | p.T1225T       | Silent                 | 1          | +1        |
| 10-141-B-R138-DNA      | -  | 4   | 1920027  | G        | A   | c.1087G>A         | NM_001042424 | Ti    | C>T/G>A         | GxC     | SNP          | 5    | WHSC1 | p.A363T        | Missense_Mutation      | 0.57       | -10       |
| 11-987-B-R138-DNA      | -  | 4   | 1955131  | C        | T   | c.2218C>T         | NM_001042424 | Ti    | C>T/G>A         | CxA     | SNP          | 12   | WHSC1 | p.H740Y        | Missense_Mutation      | 0          | +1        |
